# Supplementary material for: First-principles study of a 2-dimensional C-silicyne monolayer as a promising anode in Na/K ion secondary batteries
Source: Royal Society of Chemistry journal article supplement (doi:10.1039/d1cp01538a), 2021-01-01
Supplement: d1cp01538a1.pdf [file d1cp01538a1.pdf]

# First Principles study of 2 Dimensional C-silicyne monolayer for promising anode in Na/K ion secondary battery

Neha Yadav<sup>1</sup>, Brahmananda Chakraborty<sup>2</sup>, and T. J. Dhillip Kumar<sup>1□</sup>

<sup>1</sup>Department of Chemistry, Indian Institute of Technology Ropar, Rupnagar 140001, India

<sup>2</sup>High Pressure and Synchrotron Radiation Physics Division,  
Bhabha Atomic Research Centre, Mumbai-400085, India and

<sup>2</sup>Homi Bhabha National Institute, Mumbai-400094, India

Email: dhillip@iitrpr.ac.in

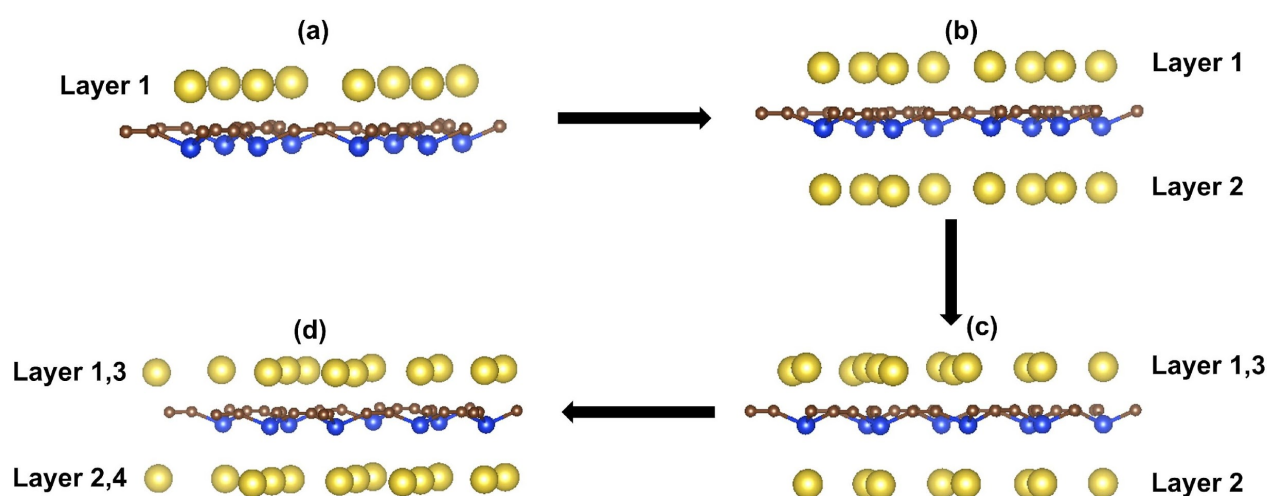

**Figure S1 (A):** (a) For storage capacity calculation, Na ions are introduced on the most favourable adsorption site (Si-T) to form layer 1 above the C-silicyne monolayer. (b) Next layer of Na ions is formed below the monolayer as layer 2. (c) After all the most favourable sites are occupied, next Na ions are introduced to the next favourable site; in the Ring. After relaxation, layer 3 is formed in between the layer 1 above the monolayer. (d) Layer 4 is formed below the monolayer in between layer 2.

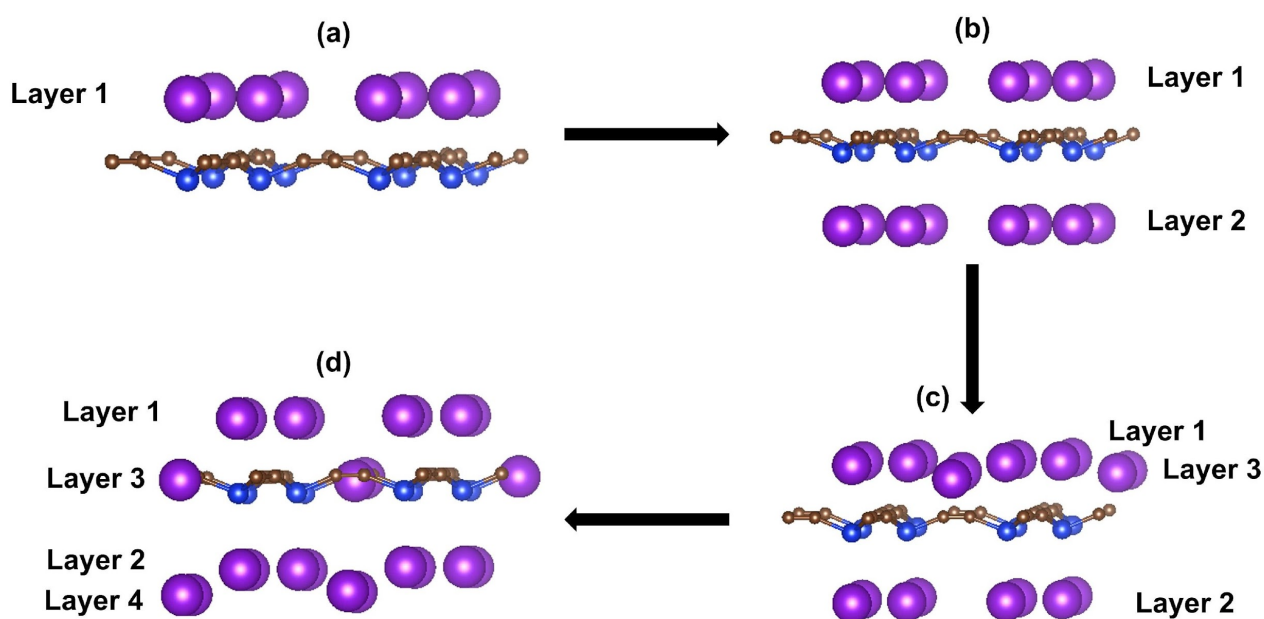

**Figure S1 (B):** (a) K ions are introduced on the most favourable adsorption site (Si-T) to form layer 1 above the C-silicene monolayer. (b) Next layer of K ions is formed below the monolayer as layer 2. (c) After all the most favourable sites are occupied, next K ions are introduced to the next favourable site; in the Ring. After relaxation, layer 3 is formed slightly below the layer 1 above the C-silicene monolayer. (d) As next K ions are introduced below the monolayer, the already adsorbed K ions rearrange themselves to accommodate next layer and thus the layer 3 shifts and layer 4 is formed below the monolayer slightly below layer 2.
